# Supplementary material for: Synthesis and structural characterisation of the copper MOF: STAM-NMe2
Source: Royal Society of Chemistry journal article supplement (doi:10.1039/c9ce01035a), 2019-01-01
Supplement: c9ce01035a1.pdf [file c9ce01035a1.pdf]

## Supporting Information

### Synthesis and Structural Characterisation of the copper MOF: STAM- NMe<sub>2</sub>.

**Lauren N. McHugh,** <sup>\*a</sup> **Leonardo Olivera Perez,** <sup>b</sup> **Paul S. Wheatley,** <sup>a</sup> **David B. Cordes,** <sup>a</sup>  
**Alexandra M. Z. Slawin** <sup>a</sup> and **Russell Morris** <sup>a</sup>

<sup>a</sup> School of Chemistry, University of St Andrews, North Haugh, St Andrews, Fife, Scotland, KY16 9ST, UK.

<sup>b</sup> Department of Chemistry, Johns Hopkins University, Remsen Hall, 3400 N Charles St, Baltimore, MD 21218, USA.

\* Email: [lm83@st-andrews.ac.uk](mailto:lm83@st-andrews.ac.uk), Tel: +44 (0)1334 463776.

## Contents

|                             |   |
|-----------------------------|---|
| Experimental .....          | 2 |
| Crystallographic Data ..... | 3 |
| Reference .....             | 6 |

## Experimental

### **Synthesis of 5-dimethylamino isophthalic acid:<sup>1</sup>**

Formaldehyde solution (37 wt% in water, 6 mL, 10 eq.) was added to a solution of 5-amino isophthalic acid (1.38 g, 7.62 mmol) in DMF (10 mL) and the solution was stirred at ambient temperature for 20 minutes. The solution was cooled to 0 °C and sodium cyanoborohydride (1.42 g, 22.60 mmol) was slowly added. The solution was then stirred for 5 hours at ambient temperature. After evaporation of the solvent, the residue was dissolved in water and precipitated by addition of 2 M hydrochloric acid. The white precipitate was filtrated and washed with water until the pH value of the filtrate was neutral, to yield 5-dimethylamino isophthalic acid (5.28 g, 83 %) as a pale yellow solid. <sup>1</sup>H NMR (400 MHz, d<sub>6</sub>-DMSO) δ<sub>H</sub> 7.79 (1 H, t, J = 2.8 Hz, 1.6Hz), 7.44 (2 H, d, J = 1.2 Hz), 2.99 (6 H, s) ppm.

## Crystallographic Data

**Fig. S1** Comparison of bulk material with the single crystal phase by a whole-pattern (Le Bail type) refinement of the unit cell against the X-ray diffraction data to confirm sample purity.

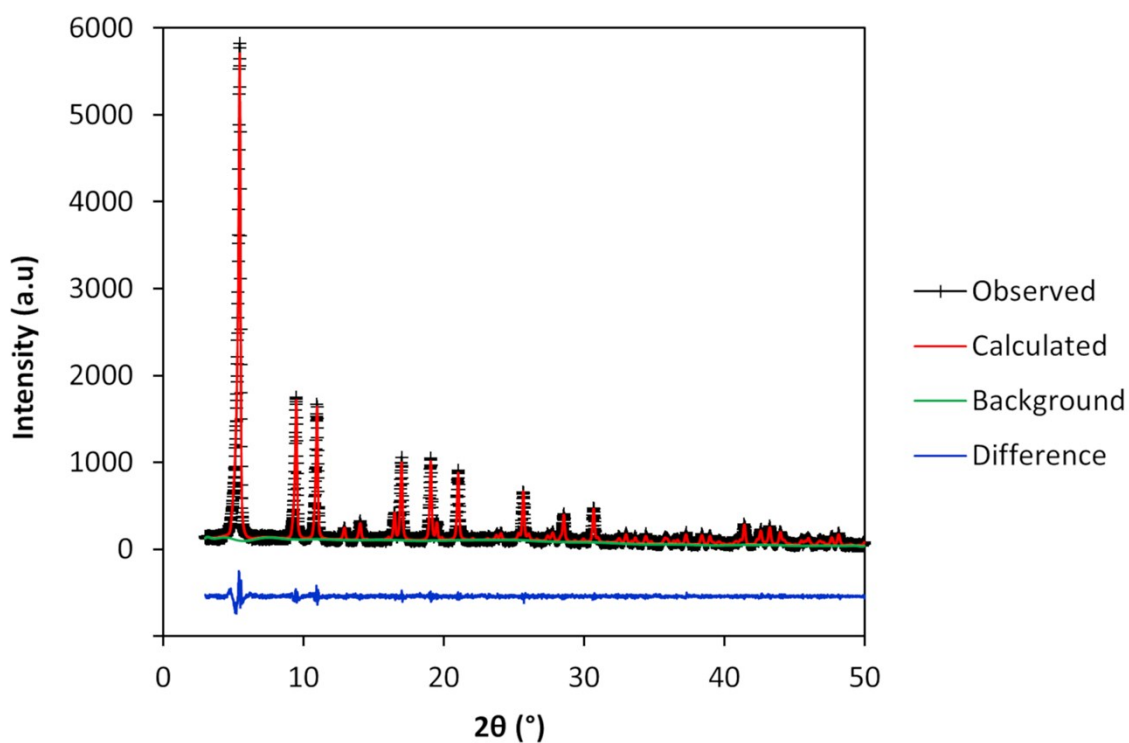

**Table. S1** Crystallographic parameters from the Le Bail powder diffraction refinement of STAM-NMe<sub>2</sub> and comparison with single crystal data.

|                             | <b>Powder</b>    | <b>Single Crystal</b> |
|-----------------------------|------------------|-----------------------|
| <b>Temperature</b>          | 298 K            | 173 K                 |
| <b>Unit cell dimensions</b> | a = 18.5669(5) Å | a = 18.5382(5) Å      |
|                             | b = 18.5669(5) Å | b = 18.5382(5) Å      |
|                             | c = 6.8288(3) Å  | c = 6.7599(2) Å       |
| <b>Unit cell angles</b>     | $\alpha = 90$    | $\alpha = 90$         |
|                             | $\beta = 90$     | $\beta = 90$          |
|                             | $\gamma = 120$   | $\gamma = 120$        |
| <b>Space Group</b>          | $P\bar{3}m1$     | $P\bar{3}m1$          |

|            |        |   |
|------------|--------|---|
| <b>wRp</b> | 0.0643 | - |
| <b>Rp</b>  | 0.0529 | - |

**Table. S2** Full crystallographic data from the single crystal structure determination of STAM-NMe<sub>2</sub>.

|                                        |                                                     |
|----------------------------------------|-----------------------------------------------------|
| <b>Identification code</b>             | <b>STAM-NMe<sub>2</sub></b>                         |
| <b>Empirical formula</b>               | C <sub>10</sub> H <sub>11</sub> CuNO <sub>5</sub>   |
| <b>Formula weight</b>                  | 288.74 g mol <sup>-1</sup>                          |
| <b>Temperature</b>                     | 173 K                                               |
| <b>Wavelength</b>                      | 0.71073 Å                                           |
| <b>Crystal system, space group</b>     | Trigonal, $P\bar{3}m1$                              |
| <b>Unit cell dimensions</b>            | a = 18.5382(5) Å                                    |
|                                        | b = 18.5382(5) Å                                    |
|                                        | c = 6.7599(2) Å                                     |
| <b>Volume</b>                          | 2011.90(12) Å <sup>3</sup>                          |
| <b>Z</b>                               | 6                                                   |
| <b>Calculated density</b>              | 1.430 g cm <sup>-3</sup>                            |
| <b>Absorption coefficient</b>          | 1.635 mm <sup>-1</sup>                              |
| <b>F(000)</b>                          | 882.0                                               |
| <b>Goof on F<sup>2</sup></b>           | 1.124                                               |
| <b>Crystal size</b>                    | 0.04 x 0.04 x 0.02 mm <sup>3</sup>                  |
| <b>Theta range for data collection</b> | 4.394 to 57.87°                                     |
| <b>Reflections collected/unique</b>    | 26670/1842 [R(int) = 0.0713]                        |
| <b>Final R indices (I&gt;2σ(I))</b>    | R <sub>1</sub> = 0.0367<br>wR <sub>2</sub> = 0.0941 |
| <b>Final R indices (all data)</b>      | R <sub>1</sub> = 0.0565<br>wR <sub>2</sub> = 0.0992 |

**Table. S3** Bond lengths for STAM-NMe<sub>2</sub> from single crystal data.

| Atom                     | Length (Å) | Atom                   | Length (Å) |
|--------------------------|------------|------------------------|------------|
| Cu(1)-Cu(1) <sup>1</sup> | 2.6032(7)  | N(1)-C(5)              | 1.386(4)   |
| Cu(1)-O(1W)              | 2.146(2)   | N(1)-C(6)              | 1.443(3)   |
| Cu(1)-O(2) <sup>1</sup>  | 1.9649(16) | N(1)-C(6) <sup>4</sup> | 1.443(3)   |
| Cu(1)-O(2) <sup>2</sup>  | 1.9649(16) | C(1)-C(2)              | 1.491(3)   |
| Cu(1)-O(1)               | 1.9524(18) | C(2)-C(4)              | 1.392(4)   |
| Cu(1)-O(1) <sup>3</sup>  | 1.9523(18) | C(2)-C(3)              | 1.392(3)   |
| O(2)-C(1)                | 1.253(3)   | C(5)-C(4)              | 1.411(3)   |
| O(1)-C(1)                | 1.251(3)   | C(5)-C(4) <sup>4</sup> | 1.411(3)   |

Symmetry transformations used to generate equivalent atoms:

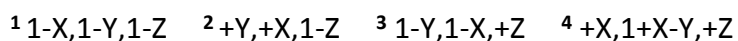**Table. S4** Bond angles for STAM-NMe<sub>2</sub> from single crystal data.

| Atom                                       | Angle (°) | Atom                        | Angle (°)  |
|--------------------------------------------|-----------|-----------------------------|------------|
| O(1W) Cu(1) Cu(1) <sup>1</sup>             | 179.02(7) | C(1) O(1) Cu(1)             | 124.42(16) |
| O(2) <sup>1</sup> Cu(1) Cu(1) <sup>1</sup> | 84.86(5)  | C(5) N(1) C(6) <sup>4</sup> | 119.29(16) |
| O(2) <sup>2</sup> Cu(1) Cu(1) <sup>1</sup> | 84.86(5)  | C(5) N(1) C(6)              | 119.29(16) |
| O(2) <sup>1</sup> Cu(1) O(1W)              | 95.83(7)  | C(6) <sup>4</sup> N(1) C(6) | 116.9(3)   |
| O(2) <sup>2</sup> Cu(1) O(1W)              | 95.83(12) | O(2) C(1) O(1)              | 124.2(2)   |
| O(2) <sup>1</sup> Cu(1) O(2) <sup>2</sup>  | 88.32(5)  | O(2) C(1) C(2)              | 118.4(2)   |
| O(1) Cu(1) Cu(1) <sup>1</sup>              | 83.82(5)  | O(1) C(1) C(2)              | 117.4(2)   |
| O(1) <sup>3</sup> Cu(1) Cu(1) <sup>1</sup> | 83.82(5)  | C(4) C(2) C(1)              | 119.9(2)   |
| O(1) Cu(1) O(1W)                           | 95.50(7)  | C(3) C(2) C(1)              | 119.9(2)   |
| O(1) <sup>3</sup> Cu(1) O(1W)              | 95.50(7)  | C(3) C(2) C(4)              | 120.8(2)   |
| O(1) <sup>3</sup> Cu(1) O(2) <sup>2</sup>  | 168.65(7) | N(1) C(5) C(4)              | 121.47(15) |
| O(1) <sup>3</sup> Cu(1) O(2) <sup>1</sup>  | 89.66(9)  | N(1) C(5) C(4) <sup>4</sup> | 121.47(15) |

|                              |            |                             |          |
|------------------------------|------------|-----------------------------|----------|
| O(1) Cu(1) O(2) <sup>1</sup> | 168.65(7)  | C(4) C(5) C(4) <sup>4</sup> | 117.0(3) |
| O(1) Cu(1) O(2) <sup>2</sup> | 89.66(9)   | C(2) C(4) C(5)              | 121.3(2) |
| O(1) <sup>3</sup> Cu(1) O(1) | 89.86(13)  | C(2) <sup>4</sup> C(3) C(2) | 118.9(3) |
| C(1) O(2) Cu(1) <sup>1</sup> | 122.66(15) |                             |          |

Symmetry transformations used to generate equivalent atoms:

<sup>1</sup> 1-X,1-Y,1-Z    <sup>2</sup> +Y,+X,1-Z    <sup>3</sup> 1-Y,1-X,+Z    <sup>4</sup> +X,1+X-Y,+Z

## Reference

[1] D. Lagnoux, E. Delort, C Douat-Casassus, A. Esposito and J-L. Reymond, *Chem. Eur. J.*, 2004, **10**, 1215-1226.
